# Supplementary material for: Cost effective Mo rich Mo2C electrocatalysts for the hydrogen evolution reaction
Source: Royal Society of Chemistry journal article supplement (doi:10.1039/c8ta02550a), 2018-01-01
Supplement: c8ta02550a1.pdf [file c8ta02550a1.pdf]

**Supporting Information**

**Cost Effective Mo Rich Mo<sub>2</sub>C Electrocatalysts for  
Hydrogen Evolution Reaction**

Jie Dong<sup>1</sup>, Qiang Wu<sup>1</sup>, Cunping Huang<sup>2</sup>, Weifeng Yao<sup>1, 3\*</sup>, Qunjie Xu<sup>1, 3\*</sup>

<sup>1</sup>Shanghai Key Laboratory of Materials Protection and Advanced Materials in Electric Power, College of Environmental & Chemical Engineering, Shanghai University of Electric Power, Shanghai, P. R. China. <sup>2</sup>Aviation Fuels Research Laboratory, Federal Aviation Administration William J. Hughes Technical Center, U.S.A. <sup>3</sup>Shanghai Institute of Pollution Control and Ecological Security, Shanghai, P. R. China.

\*Corresponding author: [yaoweifeng@shiep.edu.cn](mailto:yaoweifeng@shiep.edu.cn) and [xuqunjie@shiep.edu.cn](mailto:xuqunjie@shiep.edu.cn)

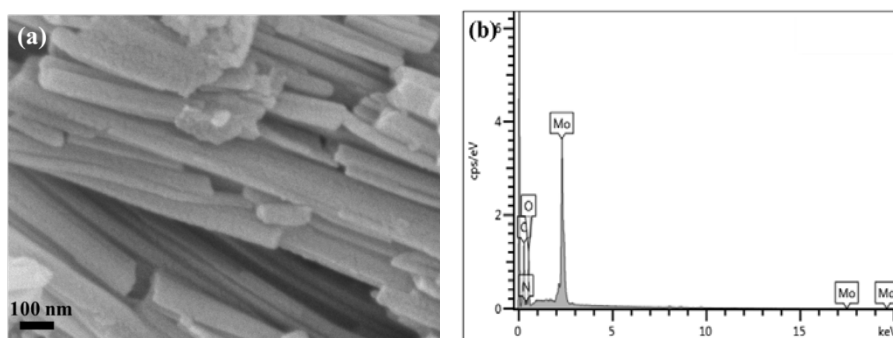

**Fig. S1.** (a) SEM image and (b) EDS of  $\text{Mo}_3\text{O}_{10}(\text{C}_6\text{H}_8\text{N})_2 \cdot 2\text{H}_2\text{O}$ .

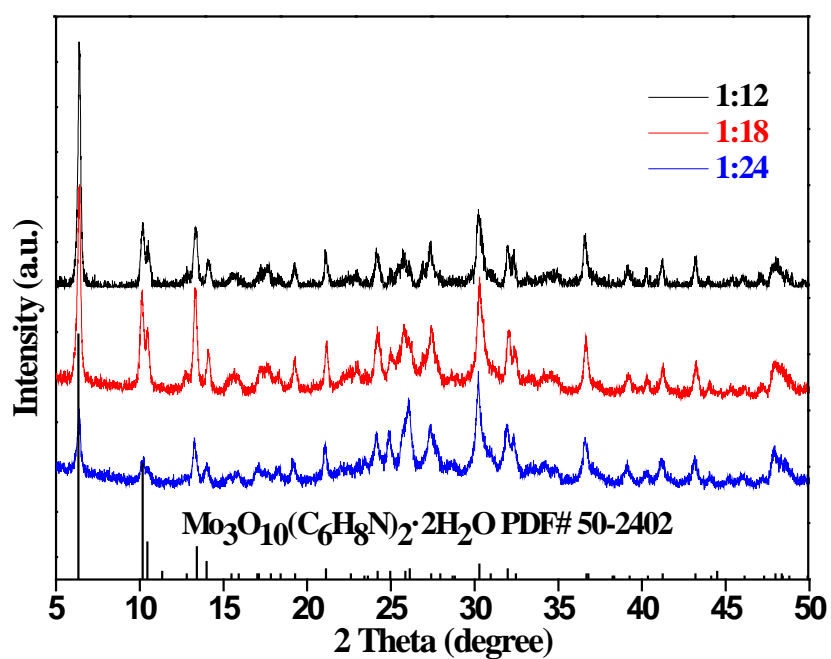

**Fig. S2.** XRD patterns of  $\text{Mo}_3\text{O}_{10}(\text{C}_6\text{H}_8\text{N})_2 \cdot 2\text{H}_2\text{O}$  and prepared Mo-Mo<sub>2</sub>C-n precursor samples with ammonium heptamolybdate to aniline molar ratio of 1:12, 1:18 and 1:24.

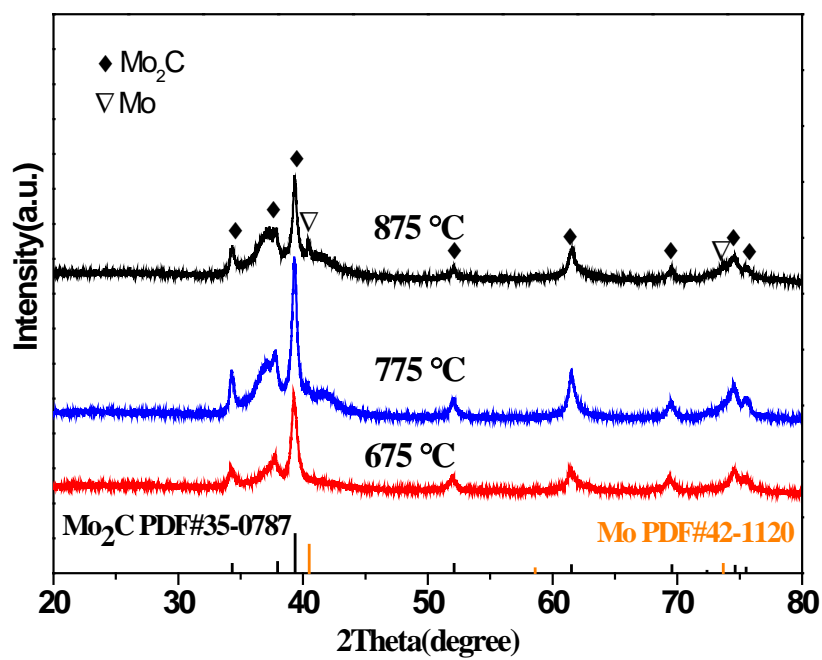

Fig. S3. XRD patterns of molybdenum carbides synthesized at 675, 775 and 875 °C.

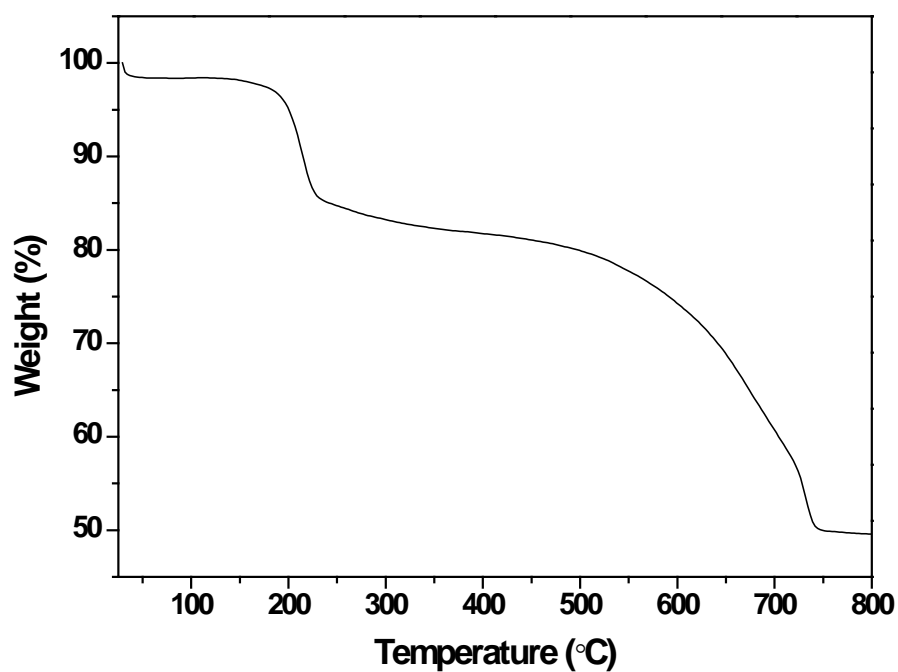

Fig. S4. TGA curve of the prepared  $\text{Mo}_3\text{O}_{10}(\text{C}_6\text{H}_8\text{N})_2 \cdot 2\text{H}_2\text{O}$  at heating rate of  $5\text{ }^\circ\text{C min}^{-1}$  under nitrogen gas from room temperature to 800 °C.

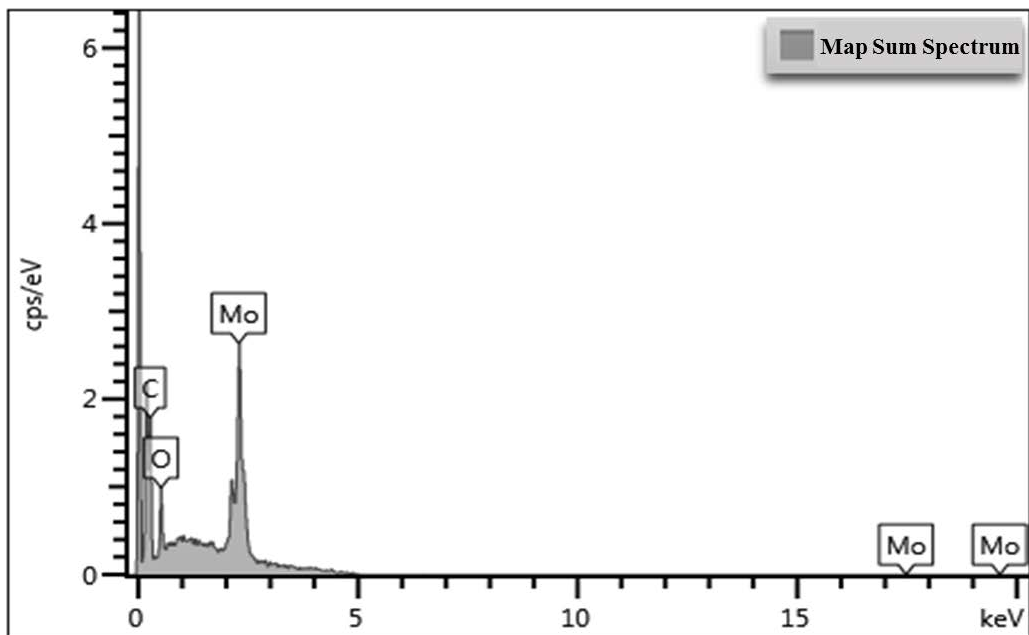

Fig. S5. EDS spectra of Mo-Mo<sub>2</sub>C-0.077

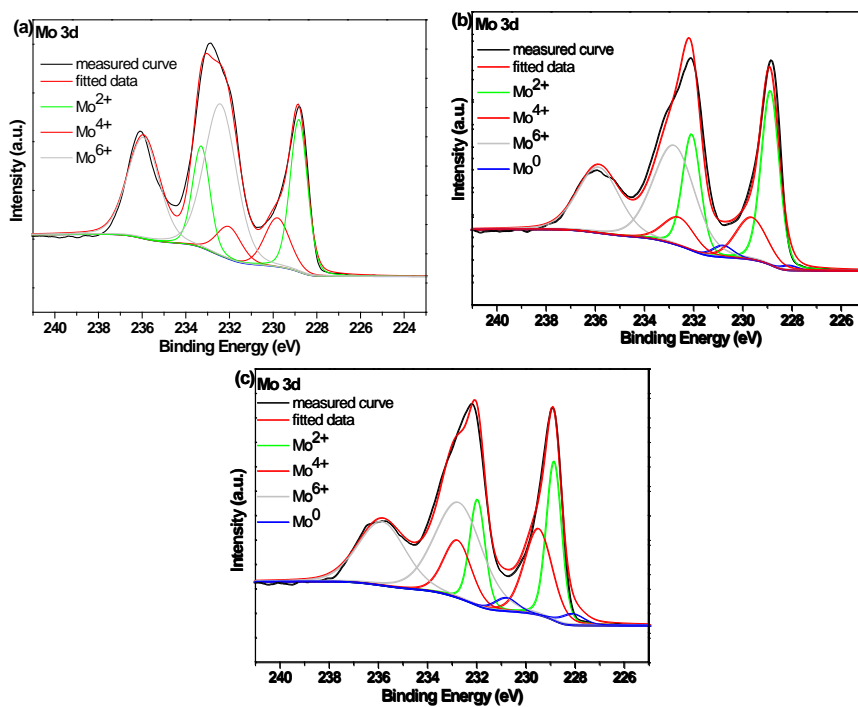

Fig. S6. (a) XPS Mo 3d spectra of Mo<sub>2</sub>C; (b) Mo-Mo<sub>2</sub>C-0.055 and; (c) Mo-Mo<sub>2</sub>C-0.082 catalyst samples.

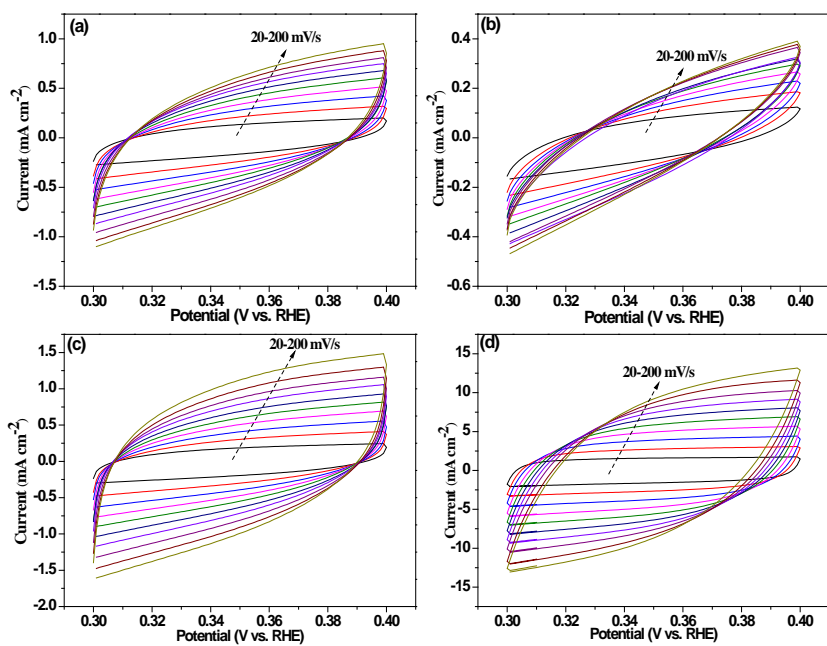

**Fig. S7.** Cyclic voltammograms of (a)  $\text{Mo}_2\text{C}$ ; (b)  $\text{Mo-Mo}_2\text{C-0.055}$ ; (c)  $\text{Mo-Mo}_2\text{C-0.077}$  and; (d)  $\text{Mo-Mo}_2\text{C-0.082}$  with scanning rates from 20 to 200  $\text{mV s}^{-1}$  and the potential range from 0.30 - 0.40 V vs RHE in a 0.5 M  $\text{H}_2\text{SO}_4$  solution.

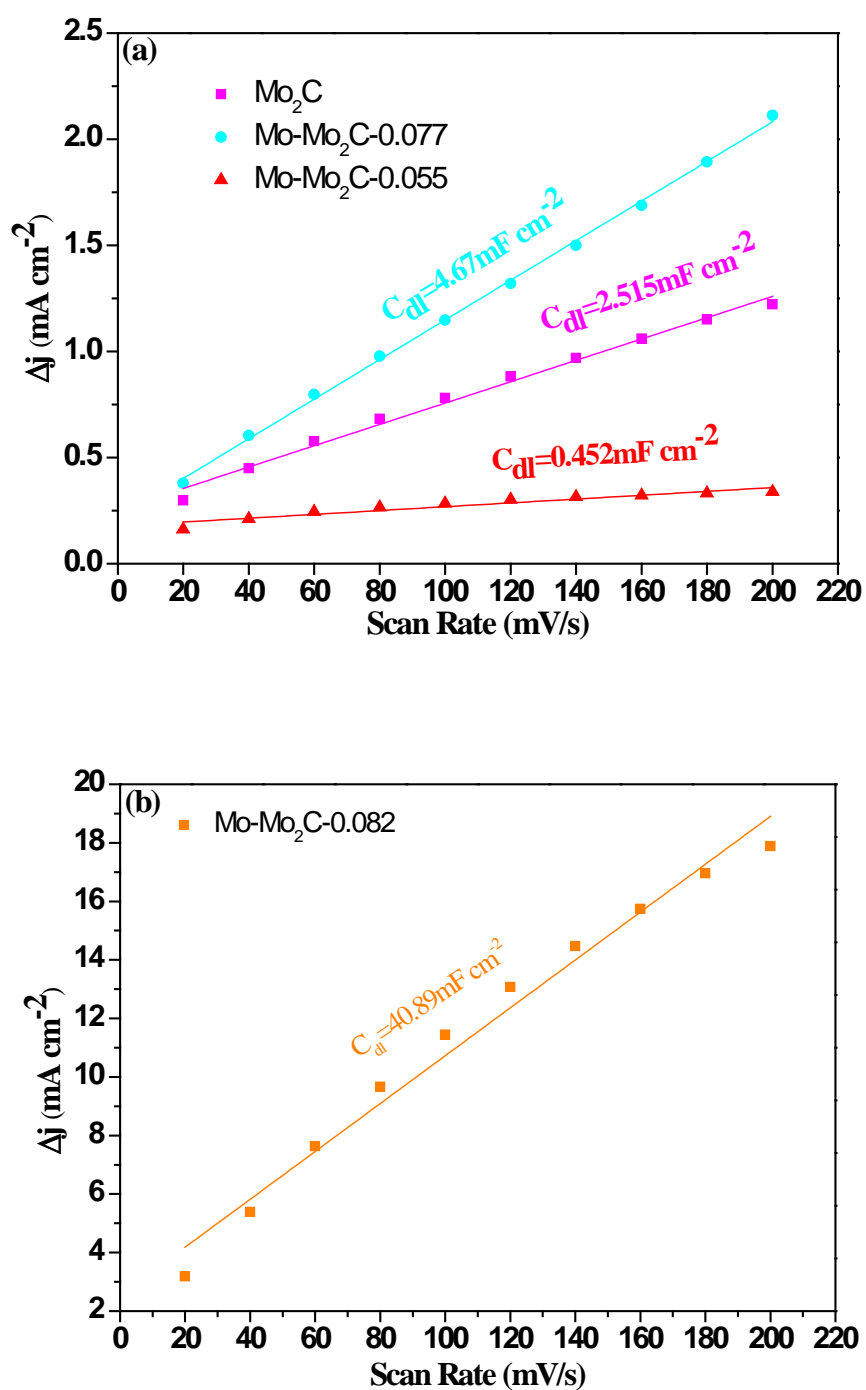

**Fig. S8.** Estimated the double-layer capacitances ( $C_{dl}$ ) by plotting the current density variation against scan rate to fit a linear regression.  $\Delta j = (j_a - j_c)/2$  was obtained at 350 mV vs. RHE the CV in Fig. S5 in the Supporting Information.

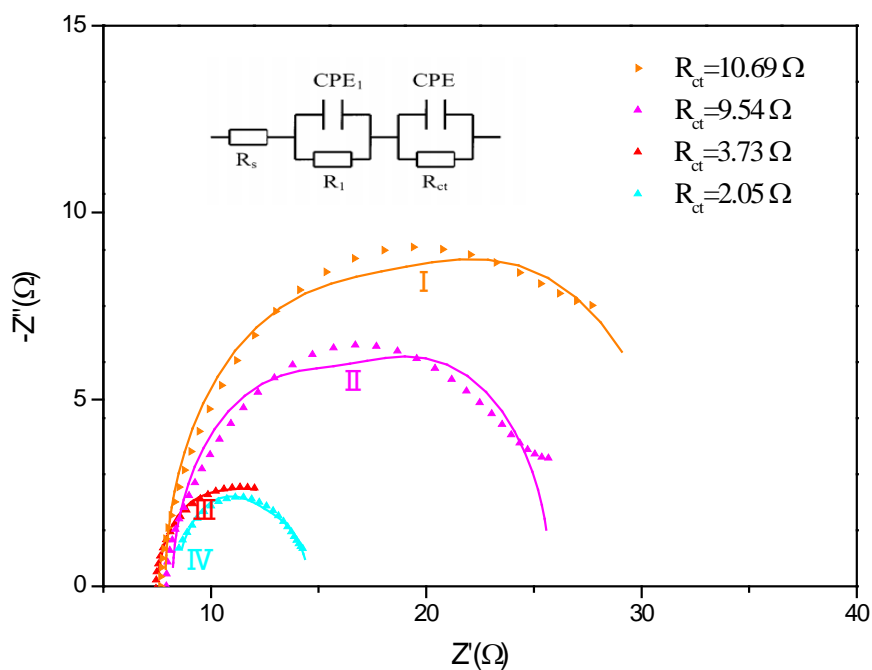

**Fig. S9.** Nyquist plots from a 0.5 M H<sub>2</sub>SO<sub>4</sub> solution on the modified GCEs comprised of ( I ) Mo-Mo<sub>2</sub>C-0.082, ( II ) Mo<sub>2</sub>C, ( III ) Mo-Mo<sub>2</sub>C-0.055, ( IV ) Mo-Mo<sub>2</sub>C-0.077, and ( V ) commercial Pt/C electrocatalysts at 180 mV in 0.5M H<sub>2</sub>SO<sub>4</sub>. The inset is an equivalent circuit model for electrochemical impedance tests.  $R_s$ ,  $R_1$  and  $R_{ct}$  represent the resistances of the electrolyte, electrode porosity and charge-transfer, respectively. The constant phase angle element (CPE) represents the double layer capacitance of a solid electrode in the real-world situation.

**Table S1.** Controlled Mo-Mo<sub>2</sub>C-n synthesis conditions

| Electrocatalyst               | AH/An* | Temperature<br>(°C) | Heating rate<br>(°C/min) | Ar flow rate<br>(ml/min) |
|-------------------------------|--------|---------------------|--------------------------|--------------------------|
| Mo <sub>2</sub> C**           | 1:18   | 675                 | 2                        | 125                      |
| Mo-Mo <sub>2</sub> C-0.055*** | 1:12   | 775                 | 2                        | 125                      |
| Mo-Mo <sub>2</sub> C-0.077    | 1:18   | 775                 | 2                        | 125                      |
| Mo-Mo <sub>2</sub> C-0.082    | 1:24   | 775                 | 2                        | 125                      |

\*Ammonium Heptamolybdate tetrahydrate/Aniline molar ratio for the synthesis of Mo-Mo<sub>2</sub>C-n.

\*\*Although at the same AH/An molar ratio of 1:18, only Mo<sub>2</sub>C is formed due to the sample annealing temperature (675 °C).

\*\*\*This number presents the Mo content.

**Table S2** Summary of the Elemental contents of Mo-Mo<sub>2</sub>C-n catalysts

| Electrocatalyst            | C content<br>(wt.%) <sup>a</sup> | O content<br>(wt.%) <sup>a</sup> | Mo content<br>(wt.%) <sup>b</sup> |
|----------------------------|----------------------------------|----------------------------------|-----------------------------------|
| Mo-Mo <sub>2</sub> C-0.055 | 5.8                              | -                                | 94.2                              |
| Mo-Mo <sub>2</sub> C-0.077 | 8.6                              | -                                | 91.4                              |
| Mo-Mo <sub>2</sub> C-0.082 | 22.8                             | 2.9                              | 74.3                              |

<sup>a</sup>Data are determined by CHNS/O elemental analysis;

<sup>b</sup>Data are calculated according to the results of a.

**Table S3** Summary of component content of Mo-Mo<sub>2</sub>C-n

| Electrocatalyst            | Mo <sub>2</sub> C content<br>(wt.%) <sup>*</sup> | Mo metallic content<br>(wt.%) <sup>*</sup> |
|----------------------------|--------------------------------------------------|--------------------------------------------|
| Mo-Mo <sub>2</sub> C-0.055 | 94.5                                             | 5.5                                        |
| Mo-Mo <sub>2</sub> C-0.077 | 92.3                                             | 7.7                                        |
| Mo-Mo <sub>2</sub> C-0.082 | 91.8                                             | 8.2                                        |

<sup>\*</sup>Data are obtained using Jade 6.0 software.



**Table S4** Comparison of the HER activities of Mo-Mo<sub>2</sub>C-0.077 with reported Mo<sub>x</sub>C electrocatalysts in a 0.5 M H<sub>2</sub>SO<sub>4</sub> electrolyte.

| Electrocatalyst                                | Loading (mg cm <sup>-2</sup> ) | $\eta_{\text{Onset}}$ (mV) | $\eta_{10}$ <sup>[a]</sup> (mV)   | Tafel slope (mV dec <sup>-1</sup> ) | $j_0$ <sup>[b]</sup> (mA cm <sup>-2</sup> ) | Counter electrode | Ref.      |
|------------------------------------------------|--------------------------------|----------------------------|-----------------------------------|-------------------------------------|---------------------------------------------|-------------------|-----------|
| Mo-Mo <sub>2</sub> C-0.077                     | 0.38                           | 67                         | 150                               | 55                                  | 0.019                                       | Graphite rod      | This work |
| Mo <sub>2</sub> C/G                            | -                              | 87                         | 236                               | 76                                  | -                                           | Pt foil           | 1         |
| Mo <sub>2</sub> C                              | 0.102                          | -                          | 198                               | 56                                  | -                                           | Graphite rod      | 2         |
| Mo <sub>2</sub> C/MoP@NPC                      | -                              | -                          | 160                               | 75                                  | -                                           | Carbon rod        | 3         |
| MoO <sub>2</sub> / $\alpha$ -Mo <sub>2</sub> C | 0.68                           | -                          | 152                               | 65                                  | -                                           | Pt foil           | 4         |
| MoO <sub>2</sub> /MoC@C                        | 0.57                           | -                          | 133( $\eta_{20}$ <sup>[c]</sup> ) | 77.3                                | 0.371                                       | Graphite rod      | 5         |
| Mo <sub>2</sub> C/CLCN                         | 0.357                          | 85                         | 145                               | 48.2                                | 0.062                                       | Carbon rod        | 6         |
| Mo <sub>2</sub> C@NPC-4                        | 0.265                          | ~44                        | 144                               | 52.5                                | -                                           | Pt wire           | 7         |
| MoC/C                                          | 0.57                           | -                          | 144( $\eta_{20}$ )                | 63.6                                | 0.104                                       | Graphite rod      | 8         |
| MoC@C                                          |                                |                            | 157( $\eta_{20}$ )                | 93.3                                | 0.390                                       |                   |           |
| Mo <sub>2</sub> C-QDs/NG                       | 0.28                           | -                          | 146                               | 60                                  | 0.05                                        | Carbon rod        | 9         |
| c- $\alpha$ -MoC <sub>1-x</sub> @BCN           | 0.7-0.8                        | 20                         | 124                               | 47                                  | 0.124                                       | Graphite rod      | 10        |
| h- $\beta$ -Mo <sub>2</sub> C@BCN              |                                | 20                         | 140                               | 103                                 | 0.392                                       |                   |           |
| o- $\beta$ -Mo <sub>2</sub> C@BCN              |                                | 48                         | 168                               | 80                                  | 0.109                                       |                   |           |
| o- $\alpha$ -Mo <sub>2</sub> C@BCN             |                                | 40                         | 195                               | 73                                  | 0.011                                       |                   |           |
| h- $\eta$ -MoC@BCN                             |                                | 45                         | 182                               | 67                                  | 0.006                                       |                   |           |
| BCF/Mo <sub>2</sub> C                          | 10.7                           | -                          | 115( $\eta_{20}$ )                | 84.8                                | -                                           | Graphite rod      | 11        |
| MoC@NC nanoribbon                              | 0.385                          | 24                         | ~150                              | 54                                  | 0.007                                       | Graphite rod      | 12        |
| Mo <sub>2</sub> C nanoribbon/N-G film          | -                              | 84                         | 162                               | 57                                  | -                                           | Carbon rod        | 13        |
| MoCat catalyst                                 | 0.4                            | 44                         | 96                                | 37                                  | 0.018                                       | Carbon electrode  | 14        |
| MoO <sub>2</sub> /C                            | 0.84                           | -                          | 246                               | 107.1                               | 0.05                                        | Carbon rod        | 15        |
| MoC/C                                          |                                |                            | 179                               | 91.1                                | 0.13                                        |                   |           |
| Mo <sub>2</sub> C/C                            |                                |                            | 135                               | 75.1                                | 0.36                                        |                   |           |
| 3DHP-Mo <sub>2</sub> C                         | -                              | 75                         | 166                               | 75                                  | 0.287                                       | Graphite rod      | 16        |
| NiMo <sub>2</sub> C@C                          | 0.15                           | 65                         | 169                               | 100                                 | 0.22                                        | Graphite rod      | 17        |
| 50R@MS                                         | 0.362                          | 20                         | 112                               | 65                                  | 0.44                                        | Graphite rod      | 18        |
| Mo <sub>2</sub> C-RGO                          | 0.285                          | 70                         | 130                               | 57.3                                | -                                           | Pt mesh           | 19        |
| MoC <sub>x</sub> nano-octahedrons              | 0.8                            | 25                         | 142                               | 53                                  | 0.023                                       | Graphite rod      | 20        |

[a]  $\eta_{10}$ : Overpotential required for an electrode to produce a current density of 10 mA cm<sup>-2</sup>.

[b]  $j_0$ : Exchange current density (mA cm<sup>-2</sup>).

[c]  $\eta_{20}$ : Overpotential required to produce a current density of 20 mA cm<sup>-2</sup>.

**References for supplementary information:**

1. D. Geng, X. Zhao, Z. Chen, W. Sun, W. Fu, J. Chen, W. Liu, W. Zhou and K. P. Loh, *Adv. Mater.*, 2017, **29**.
2. L. Ma, L. R. L. Ting, V. Molinari, C. Giordano and B. S. Yeo, *J. Mater. Chem. A*, 2015, **3**, 8361-8368.
3. J. Q. Chi, W. K. Gao, J. H. Lin, B. Dong, K. L. Yan, J. F. Qin, Z. Z. Liu, Y. M. Chai and C. G. Liu, *J. Colloid Interf. Sci.*, 2017, **513**, 151-160.
4. Y. Liu, B. Huang and Z. Xie, *Appl. Surf. Sci.*, 2018, **427**, 693-701.
5. C. C. Lv, Z. P. Huang, Q. P. Yang and C. Zhang, *Inorg. Chem. Front.*, 2018, **5**, 446-453.
6. J. Jia, W. Zhou, Z. Wei, T. Xiong, G. Li, L. Zhao, X. Zhang, H. Liu, J. Zhou and S. Chen, *Nano Energy*, 2017, **41**, 749-757.
7. L. Ji, J. Wang, L. Guo and Z. Chen, *J. Mater. Chem. A*, 2017, **5**, 5178-5186.
8. Z. H. Cuncai Lv, Qianpeng Yang, Guangfeng Wei, Zuofeng Chen, Mark G and a. C. Z. Humphrey, *J. Mater. Chem. A*, 2017, **5**, 22805-22812.
9. B. L. Lili Huo, Zhiqing Gao, and Jun Zhang., *J. Mater. Chem. A*, 2017, **5**, 18494-18501.
10. M. H. L. a. J. S. L. Mohsin Ali Raza Anjum, *J. Mater. Chem. A*, 2017, **5**, 13122-13129
11. J. Xiao, Y. Zhang, Z. Zhang, Q. Lv, F. Jing, K. Chi and S. Wang, *ACS Appl. Mater. Inter.*, 2017, **9**, 22604-22611.
12. Z. Cheng, J. Gao, Q. Fu, C. Li, X. Wang, Y. Xiao, Y. Zhao, Z. Zhang and L. Qu, *ACS Appl. Mater. Inter.*, 2017, **9**, 24608-24615.
13. J. Gao, Z. Cheng, C. Shao, Y. Zhao, Z. Zhang and L. Qu, *J. Mater. Chem. A*, 2017, **5**, 12027-12033.
14. R. R. Rajinder Kumar, Seema Goutam, Abir De Sarkar, Nidhi Tiwari, Shambhu Nath Jha, and A. K. G. a. V. B. Dibyendu Bhattacharyya, *J. Mater. Chem. A*, 2017, **5**, 7764-7768
15. J. W. Junpo Guo, Zexing Wu, Wen Lei, Jing Zhu, Kedong Xia and Deli Wang., *J. Mater. Chem. A*, 2017, **5**, 4879-4885.
16. T. Meng, L. Zheng, J. Qin, D. Zhao and M. Cao, *J. Mater. Chem. A*, 2017, **5**, 20228-20238.
17. a. L. Y. Xiao Li, Tan Su, Xinlong Wang, a Chunyi Sun, and Zhongmin Su., *J. Mater. Chem. A*, 2017, **5**, 5000-5006.
18. Y. Zhu, G. Chen, Y. Zhong, W. Zhou, M. Liu and Z. Shao, *Materials Today Energy*, 2017, **6**, 230-237.
19. L. F. Pan, Y. H. Li, S. Yang, P. F. Liu, M. Q. Yu and H. G. Yang, *Chem. Commun.*, 2014, **50**, 13135-13137.
20. H. B. Wu, B. Y. Xia, L. Yu, X. Y. Yu and X. W. Lou, *Nat. commun.*, 2015, **6**, 6512.
